# Supplementary material
Source: PubMed Central journal article supplement (PMC3993362)
Supplement: JB.01393-13_zjb999093106so1.pdf [file JB.01393-13_zjb999093106so1.pdf]

**Supplementary Table S1 O-polysaccharide structures of 31 *S. flexneri* strains tested**

| Strain (serotype) | O-polysaccharide structure                                                                                                                                                                                                                                                         | Reference                                          |
|-------------------|------------------------------------------------------------------------------------------------------------------------------------------------------------------------------------------------------------------------------------------------------------------------------------|----------------------------------------------------|
| 51571 (1a)        | $\rightarrow 2)$ - $\alpha$ -L-Rhap <sup>III</sup> -(1 $\rightarrow$ 2)- $\alpha$ -L-Rhap <sup>II</sup> -(1 $\rightarrow$ 3)- $\alpha$ -L-Rhap <sup>I</sup> -(1 $\rightarrow$ 3)- $\beta$ -D-GlcpNAc-(1 $\rightarrow$ 3)<br>  3/4<br>OAc                                           | 24<br>$\uparrow$ 4<br>$\alpha$ -D-Glcp             |
| G1661 (1a)        | $\rightarrow 2)$ - $\alpha$ -L-Rhap <sup>III</sup> -(1 $\rightarrow$ 2)- $\alpha$ -L-Rhap <sup>II</sup> -(1 $\rightarrow$ 3)- $\alpha$ -L-Rhap <sup>I</sup> -(1 $\rightarrow$ 3)- $\beta$ -D-GlcpNAc-(1 $\rightarrow$ 3)<br>  3/4<br>~65%/25% OAc                                  | 22<br>$\uparrow$ 4<br>$\alpha$ -D-Glcp             |
| 51572 (1b)        | $\rightarrow 2)$ - $\alpha$ -L-Rhap <sup>III</sup> -(1 $\rightarrow$ 2)- $\alpha$ -L-Rhap <sup>II</sup> -(1 $\rightarrow$ 3)- $\alpha$ -L-Rhap <sup>I</sup> -(1 $\rightarrow$ 3)- $\beta$ -D-GlcpNAc-(1 $\rightarrow$ 3)<br>  3/4<br>OAc                                           | 24<br>$\uparrow$ 4<br>$\alpha$ -D-Glcp             |
| G1662 (1b)        | $\rightarrow 2)$ - $\alpha$ -L-Rhap <sup>III</sup> -(1 $\rightarrow$ 2)- $\alpha$ -L-Rhap <sup>II</sup> -(1 $\rightarrow$ 3)- $\alpha$ -L-Rhap <sup>I</sup> -(1 $\rightarrow$ 3)- $\beta$ -D-GlcpNAc-(1 $\rightarrow$ 3)<br>  3/4<br>~70%/15% OAc                                  | 22<br>$\uparrow$ 4<br>$\alpha$ -D-Glcp             |
| X6 (1c)           | $\rightarrow 2)$ - $\alpha$ -L-Rhap <sup>III</sup> -(1 $\rightarrow$ 2)- $\alpha$ -L-Rhap <sup>II</sup> -(1 $\rightarrow$ 3)- $\alpha$ -L-Rhap <sup>I</sup> -(1 $\rightarrow$ 3)- $\beta$ -D-GlcpNAc-(1 $\rightarrow$ 3)<br>$\alpha$ -D-Glcp-(1 $\rightarrow$ 2)- $\alpha$ -D-Glcp | 24<br>$\uparrow$ 4<br>$\alpha$ -D-Glcp             |
| HN153 (1d)        | $\rightarrow 2)$ - $\alpha$ -L-Rhap <sup>III</sup> -(1 $\rightarrow$ 2)- $\alpha$ -L-Rhap <sup>II</sup> -(1 $\rightarrow$ 3)- $\alpha$ -L-Rhap <sup>I</sup> -(1 $\rightarrow$ 3)- $\beta$ -D-GlcpNAc-(1 $\rightarrow$ 3)<br>$\uparrow$ 3<br>$\alpha$ -D-Glcp                       | 33<br>$\uparrow$ 4<br>$\alpha$ -D-Glcp             |
| 51250 (2a)        | $\rightarrow 2)$ - $\alpha$ -L-Rhap <sup>III</sup> -(1 $\rightarrow$ 2)- $\alpha$ -L-Rhap <sup>II</sup> -(1 $\rightarrow$ 3)- $\alpha$ -L-Rhap <sup>I</sup> -(1 $\rightarrow$ 3)- $\beta$ -D-GlcpNAc-(1 $\rightarrow$ 3)<br>  3/4<br>OAc                                           | 24<br>$\uparrow$ 4<br>$\alpha$ -D-Glcp<br>~65% OAc |
| G1663 (2a)        | $\rightarrow 2)$ - $\alpha$ -L-Rhap <sup>III</sup> -(1 $\rightarrow$ 2)- $\alpha$ -L-Rhap <sup>II</sup> -(1 $\rightarrow$ 3)- $\alpha$ -L-Rhap <sup>I</sup> -(1 $\rightarrow$ 3)- $\beta$ -D-GlcpNAc-(1 $\rightarrow$ 3)<br>  3/4<br>~65%/25% OAc                                  | 22<br>$\uparrow$ 4<br>$\alpha$ -D-Glcp<br>~60% OAc |
| 51251 (2b)        | $\rightarrow 2)$ - $\alpha$ -L-Rhap <sup>III</sup> -(1 $\rightarrow$ 2)- $\alpha$ -L-Rhap <sup>II</sup> -(1 $\rightarrow$ 3)- $\alpha$ -L-Rhap <sup>I</sup> -(1 $\rightarrow$ 3)- $\beta$ -D-GlcpNAc-(1 $\rightarrow$ 3)<br>$\uparrow$ 3<br>$\alpha$ -D-Glcp                       | this work<br>$\uparrow$ 4<br>$\alpha$ -D-Glcp      |
| 51575 (3a)        | $\rightarrow 2)$ - $\alpha$ -L-Rhap <sup>III</sup> -(1 $\rightarrow$ 2)- $\alpha$ -L-Rhap <sup>II</sup> -(1 $\rightarrow$ 3)- $\alpha$ -L-Rhap <sup>I</sup> -(1 $\rightarrow$ 3)- $\beta$ -D-GlcpNAc-(1 $\rightarrow$ 3)<br>$\uparrow$ 3<br>$\alpha$ -D-Glcp                       | 24<br>  2<br>OAc<br>~70% OAc                       |
| G1665 (3a)        | $\rightarrow 2)$ - $\alpha$ -L-Rhap <sup>III</sup> -(1 $\rightarrow$ 2)- $\alpha$ -L-Rhap <sup>II</sup> -(1 $\rightarrow$ 3)- $\alpha$ -L-Rhap <sup>I</sup> -(1 $\rightarrow$ 3)- $\beta$ -D-GlcpNAc-(1 $\rightarrow$ 3)<br>$\uparrow$ 3<br>$\alpha$ -D-Glcp                       | 2<br>  2<br>OAc<br>~40% OAc                        |
| G1666 (3b)        | $\rightarrow 2)$ - $\alpha$ -L-Rhap <sup>III</sup> -(1 $\rightarrow$ 2)- $\alpha$ -L-Rhap <sup>II</sup> -(1 $\rightarrow$ 3)- $\alpha$ -L-Rhap <sup>I</sup> -(1 $\rightarrow$ 3)- $\beta$ -D-GlcpNAc-(1 $\rightarrow$ 3)<br>  2<br>OAc                                             | 2<br>OAc                                           |
| NCTC 9725 (4a)    | $\rightarrow 2)$ - $\alpha$ -L-Rhap <sup>III</sup> -(1 $\rightarrow$ 2)- $\alpha$ -L-Rhap <sup>II</sup> -(1 $\rightarrow$ 3)- $\alpha$ -L-Rhap <sup>I</sup> -(1 $\rightarrow$ 3)- $\beta$ -D-GlcpNAc-(1 $\rightarrow$ 3)<br>$\uparrow$ 6<br>$\alpha$ -D-Glcp                       | 17<br>$\uparrow$ 6<br>$\alpha$ -D-Glcp             |
| G1668 (4av)       | $\rightarrow 2)$ - $\alpha$ -L-Rhap <sup>III</sup> -(1 $\rightarrow$ 2)- $\alpha$ -L-Rhap <sup>II</sup> -(1 $\rightarrow$ 3)- $\alpha$ -L-Rhap <sup>I</sup> -(1 $\rightarrow$ 3)- $\beta$ -D-GlcpNAc-(1 $\rightarrow$ 3)<br>  3<br>PEtN                                            | 19<br>$\uparrow$ 6<br>$\alpha$ -D-Glcp             |
