# Supplementary material
Source: PubMed Central journal article supplement (PMC3993362)
Supplement: JB.01393-13_zjb999093106so2.pdf [file JB.01393-13_zjb999093106so2.pdf]

Supplementary Table S2 <sup>1</sup>H and <sup>13</sup>C NMR chemical shifts (δ, ppm) of *S. flexneri*

O-polysaccharides

| Residue                             | Monosaccharide |           |                   |           |           |                   |
|-------------------------------------|----------------|-----------|-------------------|-----------|-----------|-------------------|
|                                     | C1             | C2        | C3                | C4        | C5        | C6                |
|                                     | <i>H1</i>      | <i>H2</i> | <i>H3 (3a,3b)</i> | <i>H4</i> | <i>H5</i> | <i>H6 (6a,6b)</i> |
| <i>Sf301, 301ΔoacB_pSQZ4 (2a)</i>   |                |           |                   |           |           |                   |
| →2)-α-L-Rhap3Ac <sup>III</sup> -(1→ | 102.8          | 78.2      | 74.1              | 71.6      | 70.8      | 18.3              |
|                                     | 5.15           | 4.26      | 5.09              | 3.50      | 3.82      | 1.32              |
| →2)-α-L-Rhap4Ac <sup>III</sup> -(1→ | 102.8          | 79.3      | 69.7              | 75.8      | 68.6      | 18.2              |
|                                     | 5.10           | 4.23      | 4.10              | 4.80      | 3.92      | 1.18              |
| →2)-α-L-Rhap <sup>II</sup> -(1→     | 102.8          | 81.0      | 71.2              | 73.6      | 70.7      | 18.0              |
|                                     | 5.06           | 4.09      | 3.88              | 3.49      | 3.81      | 1.30              |
| →3,4)-α-L-Rhap <sup>I</sup> -(1→    | 102.2          | 72.2      | 80.5              | 76.1      | 70.5      | 19.3              |
|                                     | 4.88           | 3.94      | 3.94              | 3.79      | 4.16      | 1.34              |
| →3)-β-D-GlcpNAc6Ac-(1→              | 103.7          | 57.0      | 82.5              | 71.2      | 74.6      | 64.8              |
|                                     | 4.54           | 3.85      | 3.66              | 3.42      | 3.63      | 4.21, 4.33        |
| α-D-Glcp-(1→                        | 98.9           | 72.7      | 74.1              | 71.2      | 73.2      | 62.1              |
|                                     | 5.20           | 3.54      | 3.73              | 3.42      | 3.97      | 3.80, 3.89        |
| <i>301Δoac3B_pSQZA (2a)</i>         |                |           |                   |           |           |                   |
| →2)-α-L-Rhap <sup>III</sup> -(1→    | 102.8          | 80.1      | 71.2              | 73.8      | 70.8      | 18.3              |
|                                     | 5.13           | 4.15      | 3.88              | 3.33      | 3.76      | 1.29              |
| →2)-α-L-Rhap <sup>II</sup> -(1→     | 103.1          | 80.7      | 71.2              | 73.6      | 70.8      | 18.0              |
|                                     | 5.02           | 4.10      | 3.88              | 3.48      | 3.80      | 1.29              |
| →3,4)-α-L-Rhap <sup>I</sup> -(1→    | 102.4          | 72.2      | 80.7              | 76.1      | 70.5      | 19.3              |
|                                     | 4.84           | 3.94      | 3.92              | 3.79      | 4.16      | 1.34              |
| →3)-β-D-GlcpNAc6Ac-(1→              | 103.7          | 57.0      | 82.5              | 71.2      | 74.6      | 64.8              |
|                                     | 4.54           | 3.85      | 3.66              | 3.42      | 3.63      | 4.21, 4.33        |
| α-D-Glcp-(1→                        | 98.9           | 72.7      | 74.1              | 71.2      | 73.2      | 62.1              |
|                                     | 5.20           | 3.54      | 3.73              | 3.42      | 3.97      | 3.80, 3.89        |

*51251 (2b)*

|                                                                        |       |      |      |      |      |            |
|------------------------------------------------------------------------|-------|------|------|------|------|------------|
| $\rightarrow 2,3$ )- $\alpha$ -L-Rhap <sup>III</sup> -(1 $\rightarrow$ | 102.8 | 75.7 | 75.1 | 72.3 | 70.7 | 18.4       |
|                                                                        | 5.12  | 4.43 | 3.95 | 3.36 | 3.79 | 1.30       |
| $\rightarrow 2$ )- $\alpha$ -L-Rhap <sup>II</sup> -(1 $\rightarrow$    | 102.7 | 80.9 | 71.2 | 73.6 | 70.7 | 18.1       |
|                                                                        | 5.05  | 4.11 | 3.88 | 3.49 | 3.79 | 1.31       |
| $\rightarrow 3,4$ )- $\alpha$ -L-Rhap <sup>I</sup> -(1 $\rightarrow$   | 102.4 | 72.2 | 80.5 | 76.1 | 70.4 | 19.3       |
|                                                                        | 4.83  | 3.92 | 3.92 | 3.79 | 4.15 | 1.34       |
| $\rightarrow 3$ )- $\beta$ -D-GlcpNAc-(1 $\rightarrow$                 | 103.0 | 56.8 | 83.0 | 69.8 | 77.4 | 62.2       |
|                                                                        | 4.80  | 3.86 | 3.49 | 3.54 | 3.48 | 3.76, 3.91 |
| $\alpha$ -D-Glcp <sup>I</sup> -(1 $\rightarrow$                        | 98.7  | 72.7 | 74.1 | 71.2 | 73.2 | 61.8       |
|                                                                        | 5.19  | 3.55 | 3.72 | 3.43 | 3.96 | 3.78, 3.83 |
| $\alpha$ -D-Glcp <sup>II</sup> -(1 $\rightarrow$                       | 95.9  | 72.8 | 74.6 | 71.0 | 72.8 | 62.1       |
|                                                                        | 5.18  | 3.72 | 3.83 | 3.50 | 4.04 | 3.79, 3.87 |

*51251\_pSQZ4 (2a)*

|                                                                         |       |      |      |      |      |            |
|-------------------------------------------------------------------------|-------|------|------|------|------|------------|
| $\rightarrow 2$ )- $\alpha$ -L-Rhap3Ac <sup>III</sup> -(1 $\rightarrow$ | 102.7 | 78.2 | 74.0 | 71.6 | 70.8 | 18.2       |
|                                                                         | 5.16  | 4.25 | 5.07 | 3.50 | 3.85 | 1.31       |
| $\rightarrow 2$ )- $\alpha$ -L-Rhap4Ac <sup>III</sup> -(1 $\rightarrow$ | 102.7 | 79.1 | 69.5 | 75.6 | 68.7 | 18.2       |
|                                                                         | 5.14  | 4.23 | 4.10 | 4.79 | 3.91 | 1.17       |
| $\rightarrow 2$ )- $\alpha$ -L-Rhap <sup>II</sup> -(1 $\rightarrow$     | 102.7 | 80.9 | 71.1 | 73.4 | 70.7 | 18.0       |
|                                                                         | 5.05  | 4.12 | 3.88 | 3.53 | 3.80 | 1.29       |
| $\rightarrow 3,4$ )- $\alpha$ -L-Rhap <sup>I</sup> -(1 $\rightarrow$    | 102.2 | 72.2 | 80.5 | 76.0 | 70.5 | 19.2       |
|                                                                         | 4.87  | 3.93 | 3.93 | 3.80 | 4.16 | 1.34       |
| $\rightarrow 3$ )- $\beta$ -D-GlcpNAc-(1 $\rightarrow$                  | 103.8 | 56.9 | 82.4 | 69.4 | 76.9 | 62.1       |
|                                                                         | 4.52  | 3.84 | 3.65 | 3.56 | 3.38 | 3.78, 3.88 |
| $\alpha$ -D-Glcp-(1 $\rightarrow$                                       | 98.8  | 72.6 | 74.0 | 71.2 | 73.2 | 62.1       |
|                                                                         | 5.19  | 3.54 | 3.72 | 3.42 | 3.97 | 3.78, 3.88 |

|                                                                         |       |      |      |      |      |            |
|-------------------------------------------------------------------------|-------|------|------|------|------|------------|
| <i>51580 (X)</i>                                                        |       |      |      |      |      |            |
| $\rightarrow 2,3$ )- $\alpha$ -L-Rhap <sup>III</sup> -(1 $\rightarrow$  | 102.2 | 75.6 | 74.9 | 72.1 | 70.7 | 18.0       |
|                                                                         | 5.10  | 4.43 | 3.94 | 3.35 | 3.72 | 1.24       |
| $\rightarrow 2$ )- $\alpha$ -L-Rhap <sup>II</sup> -(1 $\rightarrow$     | 101.9 | 79.6 | 71.1 | 73.2 | 70.3 | 17.8       |
|                                                                         | 5.19  | 4.07 | 3.92 | 3.48 | 3.74 | 1.31       |
| $\rightarrow 3$ )- $\alpha$ -L-Rhap <sup>I</sup> -(1 $\rightarrow$      | 102.2 | 71.8 | 78.4 | 72.9 | 70.2 | 17.6       |
|                                                                         | 4.85  | 3.84 | 3.78 | 3.53 | 4.02 | 1.23       |
| $\rightarrow 3$ )- $\beta$ -D-GlcpNAc-(1 $\rightarrow$                  | 102.5 | 56.7 | 82.8 | 69.5 | 77.3 | 62.0       |
|                                                                         | 4.82  | 3.85 | 3.49 | 3.51 | 3.43 | 3.74, 3.90 |
| $\alpha$ -D-Glcp-(1 $\rightarrow$                                       | 95.7  | 72.6 | 74.4 | 70.7 | 72.7 | 61.5       |
|                                                                         | 5.18  | 3.72 | 3.83 | 3.49 | 4.04 | 3.78, 3.82 |
| <i>51580_pSQZ4 (Y)</i>                                                  |       |      |      |      |      |            |
| $\rightarrow 2$ )- $\alpha$ -L-Rhap3Ac <sup>III</sup> -(1 $\rightarrow$ | 102.5 | 78.3 | 74.0 | 71.4 | 70.7 | 18.1       |
|                                                                         | 5.16  | 4.25 | 5.06 | 3.50 | 3.79 | 1.27       |
| $\rightarrow 2$ )- $\alpha$ -L-Rhap4Ac <sup>III</sup> -(1 $\rightarrow$ | 102.8 | 79.2 | 69.6 | 75.6 | 68.6 | 18.1       |
|                                                                         | 5.13  | 4.23 | 4.10 | 4.78 | 3.85 | 1.13       |
| $\rightarrow 2$ )- $\alpha$ -L-Rhap <sup>II</sup> -(1 $\rightarrow$     | 102.2 | 79.9 | 71.4 | 73.5 | 70.6 | 18.1       |
|                                                                         | 5.18  | 4.07 | 3.92 | 3.53 | 3.76 | 1.31       |
| $\rightarrow 3$ )- $\alpha$ -L-Rhap <sup>I</sup> -(1 $\rightarrow$      | 102.6 | 72.0 | 78.6 | 73.1 | 70.5 | 17.8       |
|                                                                         | 4.89  | 3.85 | 3.80 | 3.55 | 4.01 | 1.23       |
| $\rightarrow 3$ )- $\beta$ -D-GlcpNAc-(1 $\rightarrow$                  | 103.6 | 57.1 | 82.6 | 69.5 | 77.1 | 62/0       |
|                                                                         | 4.54  | 3.85 | 3.65 | 3.55 | 3.40 | 3.73, 3.93 |

Only major chemical shifts are given for GlcNAc6Ac and non-O-acetylated monosaccharide residues, whose signals are split owing to non-stoichiometric O-acetylation on Rha<sup>III</sup>.

Additional signals for NAc are at  $\delta_C$  175.3-176.0 (CO) and 23.7-23.8 (CH<sub>3</sub>),  $\delta_H$  2.05-2.11 (CH<sub>3</sub>); for OAc at  $\delta_C$  175.1-175.3 (CO) and 21.7-22.1 (CH<sub>3</sub>),  $\delta_H$  2.13-2.21.
